# Supplementary material for: HMGB1 Promotes In Vitro and In Vivo Skeletal Muscle Atrophy through an IL-18-Dependent Mechanism
Source: Cells. 2022 Dec 6;11(23):3936. doi: 10.3390/cells11233936 (PMC9740799; doi:10.3390/cells11233936)
Supplement: Supplementary file 1 [file cells-11-03936-s001.zip › cells-2038245-supplementary.pdf]

## Supplementary Tables

**Table S1.** List of primers used in qRT-PCR

| Gene                          | Sequences (5'-3')                                                      |
|-------------------------------|------------------------------------------------------------------------|
| <i>Atrogin-1</i>              | Forward: GAGTGGCATCGCCCAAAAGA<br>Reverse: TCTGGAGAAGTTCCCGTATAAGT      |
| <i>MuRF-2</i>                 | Forward: GTCCTGGTGACACAGATTGGAT<br>Reverse: TGCTGCCTATGTGCTTCTCA       |
| <i>Myostatin</i>              | Forward: CTGGTCCTGGGAAGGTTACA<br>Reverse: ACGCTACCACGGAAACAATC         |
| <i>IGF-1</i>                  | Forward: GGACCGAGGGGCTTTTACTT<br>Reverse: GTGGGGCACAGTACATCTCC         |
| <i>MyoD</i>                   | Forward: GAGGATCCGATGGAGCTTCTATCG<br>Reverse: CGGATCCTCTCAAAGCACCTGATA |
| <i>Pax-7</i>                  | Forward: GGTCCCCAGGATGATGAGA<br>Reverse: TTGATGAAGACCCCAACCAAG         |
| <i>MyoG</i>                   | Forward: GACCTGATGGAGCTGTATGAG<br>Reverse: CTGAAGGTGGACAGGAAGG         |
| <i>IL-18</i>                  | Forward: GACCTGGAATCAGACAACTTTGG<br>Reverse: GCCTCGGGTATTCTGTTATGGA    |
| <i>IL-6</i>                   | Forward: GATGGTCTTGGTCCTTAGCC<br>Reverse: GGGAAATCGTGGAATGAGA          |
| <i>IL-1<math>\beta</math></i> | Forward: GCAACTGTTCTGAACTCAACT                                         |

|                                |                                                                            |
|--------------------------------|----------------------------------------------------------------------------|
|                                | Reverse: ATCTTTTGGGGTCCGTCAACT                                             |
| <i>TNF-<math>\alpha</math></i> | Forward: CAAAGGGAGAGTGGTCAGGT<br>Reverse: GGCAACAAGGTAGAGAGGC              |
| <i>HMGB1</i>                   | Forward: GCA TCC TGG CTT ATC CAT TG<br>Reverse: TGC TCT TTT CAG CCT TGA CC |
| <i>GAPDH</i>                   | Forward: ACCACAGTCCATGCCATCAC<br>Reverse: TCCACCACCCTGTTGCTGTA             |

**Table S2.** List of reagents, resources, and antibodies.

| ANTIBODIES / REAGENTS / RESOURCES                 |              |                          |               |
|---------------------------------------------------|--------------|--------------------------|---------------|
| ANTOBODIES                                        | HOST/ISOTYPE | SOURCE                   | IDENTIFIER    |
| GDF-11/GDF-8 polyclonal antibody                  | Goat / IgG   | R&D system               | Cat#MAB788-SP |
| MURF2 polyclonal antibody                         | Goat / IgG   | Thermo Fisher Scientific | Cat#PA5-18142 |
| IGF-1 polyclonal antibody                         | Rabbit / IgG | Thermo Fisher Scientific | Cat#PA5-27207 |
| Neutralizing RAGE polyclonal antibody             | Rabbit / IgG | Thermo Fisher Scientific | Cat#PA1-075   |
| Myosin skeletal muscle polyclonal antibody        | Rabbit / IgG | Thermo Fisher Scientific | Cat#PA5-31466 |
| MAFbx/Atrogin-1 (F-9) monoclonal antibody         | Mouse / IgG  | Santa Cruz Biotech       | Cat#sc-166806 |
| MyoD (G-1) monoclonal antibody                    | Mouse / IgG  | Santa Cruz Biotech       | Cat#sc-377460 |
| PI3-kinase p85 $\alpha$ (B-9) monoclonal antibody | Mouse / IgG  | Santa Cruz Biotech       | Cat#sc-1637   |
| Akt1 (B-1) monoclonal antibody                    | Mouse / IgG  | Santa Cruz Biotech       | Cat#sc-5298   |

|                                                                |              |                     |                |
|----------------------------------------------------------------|--------------|---------------------|----------------|
| p-Akt1/2/3 (Thr308) monoclonal antibody                        | Rabbit / IgG | Santa Cruz Biotech  | Cat#sc-16646-R |
| c-Jun (G-4) monoclonal antibody                                | Mouse / IgG  | Santa Cruz Biotech  | Cat#sc-74543   |
| p-c-Jun (KM-1) monoclonal antibody                             | Mouse / IgG  | Santa Cruz Biotech  | Cat#sc-822     |
| HMG-1/HMGB1 (J2E1) monoclonal antibody                         | Mouse / IgG  | Santa Cruz Biotech  | Cat#sc-135809  |
| Neutralizing IL-18 monoclonal antibody                         | Rat / IgG    | MBL                 | Cat#D048-3     |
| IL-18 polyclonal antibody                                      | Rabbit / IgG | Abcam               | Cat#ab71495    |
| Pax-7 polyclonal antibody                                      | Rabbit / IgG | Abcam               | Cat#ab187339   |
| Dystrophin polyclonal antibody                                 | Rabbit / IgG | Abcam               | Cat#ab15277    |
| Desmin polyclonal antibody                                     | Rabbit / IgG | Abcam               | Cat#ab216616   |
| $\alpha$ -Tubulin monoclonal antibody                          | Mouse / IgG  | Abcam               | Cat#ab7291     |
| Phospho-PI3 kinase p85(Tyr458)/p55(Tyr199) polyclonal antibody | Rabbit / IgG | Cell Signaling Tech | Cat#4228S      |
| mTOR (7C10) monoclonal antibody                                | Rabbit / IgG | Cell Signaling Tech | Cat#2983S      |
| Phospho-mTOR (Ser2448) (D9C2) monoclonal antibody              | Rabbit / IgG | Cell Signaling Tech | Cat#5536S      |
| $\beta$ -Actin monoclonal antibody                             | Mouse / IgG  | Sigma-Aldrich       | Cat#A5441      |
| Rabbit anti-goat IgG-HRP conjugated secondary antibody         | Rabbit / IgG | Sigma-Aldrich       | Cat#A8919      |
| Goat anti-rabbit IgG-HRP conjugated secondary antibody         | Goat / IgG   | Santa Cruz Biotech  | Cat#sc-2004    |

|                                                                           |             |                                              |                      |
|---------------------------------------------------------------------------|-------------|----------------------------------------------|----------------------|
| Mouse anti-rabbit IgG-HRP conjugated secondary antibody                   | Mouse / IgG | Santa Cruz Biotech                           | Cat#sc-2357          |
| Goat anti-rabbit IgG (H+L), Alexa Fluor 488 conjugated secondary antibody | Goat / IgG  | Thermo Fisher Scientific                     | Cat#A32731           |
| Goat anti-rabbit IgG (H+L), Alexa Fluor 594 conjugated secondary antibody | Goat / IgG  | Thermo Fisher Scientific                     | Cat#A32740           |
| <b>CHEMICALS, siRNA, PLASMIDS, AND RECOMBINANT PROTEIN</b>                |             | <b>SOURCE</b>                                | <b>IDENTIFIER</b>    |
| Recombinant mouse HMGB1 protein                                           |             | Biorbyt                                      | Cat#orb57027         |
| LY294002 (PI3 kinase inhibitor)                                           |             | Enzo Life Sciences                           | Cat#ALX-270-038      |
| Akt inhibitor                                                             |             | Sigma-Aldrich                                | Cat#A6730            |
| Rapamycin (mTOR inhibitor)                                                |             | Sigma-Aldrich                                | Cat#R0395            |
| Tanshinone IIA                                                            |             | Santa Cruz Biotech                           | Cat#sc-200932        |
| Control siRNA                                                             |             | Dharmacon Research                           | Cat#D-001810-10-05   |
| P85 siRNA                                                                 |             | Dharmacon Research                           | Cat#L-041079-00-0005 |
| Akt siRNA                                                                 |             | Dharmacon Research                           | Cat#L-040709-00-0005 |
| mTOR siRNA                                                                |             | Dharmacon Research                           | Cat#L00300800        |
| RAGE siRNA                                                                |             | Santa Cruz Biotech                           | Cat#sc-36374         |
| c-Jun siRNA                                                               |             | Santa Cruz Biotech                           | Cat#sc-29223         |
| Mouse shRNA HMGB1 plasmid                                                 |             | National RNAi Core Facility (Sinica, Taiwan) | Cat#TRCN0000365913   |
| CMV promoter plasmid                                                      |             | Addgene                                      | Cat#169739           |
| MD plasmid                                                                |             | Addgene                                      | Cat#20864            |
| DAPI                                                                      |             | Sigma-Aldrich                                | Cat#D9564            |
| Glycerol solution                                                         |             | Sigma-Aldrich                                | Cat#56-81-5          |

| <b>CRITICAL COMMERCIAL ASSAY</b>                 | <b>SOURCE</b>            | <b>IDENTIFIER</b>                                                   |
|--------------------------------------------------|--------------------------|---------------------------------------------------------------------|
| Mouse IL-18 ELISA Kit                            | R&D systems              | Cat#DY7625-05                                                       |
| IHC Kit                                          | Sigma-Aldrich            | Cat#00-4955-58                                                      |
| <b>CELLS LINE</b>                                | <b>SOURCE</b>            | <b>IDENTIFIER</b>                                                   |
| C2C12 mouse myoblast                             | ATCC                     | Cat#CRL-1772                                                        |
| G7 mouse myoblast                                | ATCC                     | Cat#CRL-1447                                                        |
| 293 T                                            | Thermo Fisher Scientific | Cat#R700007                                                         |
| <b>CULTURE MEDIUM</b>                            | <b>SOURCE</b>            | <b>IDENTIFIER</b>                                                   |
| Dulbecco's Modified Eagle's Medium (DMEM)        | Gibco                    | Cat#41966-029                                                       |
| Fetal bovine serum (FBS)                         | Gibco                    | Cat#21875-034                                                       |
| Horse serum (HS)                                 | Gibco                    | Cat#16050-122                                                       |
| Trypsin                                          | Gibco                    | Cat#15090-046                                                       |
| <b>MOUSE MODEL</b>                               | <b>SOURCE</b>            | <b>IDENTIFIER</b>                                                   |
| C57BL/6J mice                                    | The Jackson Laboratory   | Cat#000664                                                          |
| <b>SOFTWARE</b>                                  | <b>SOURCE</b>            | <b>IDENTIFIER</b>                                                   |
| ImageJ software                                  | Wayne Rasband (NIH)      | <a href="https://imagej.nih.gov/ij/">https://imagej.nih.gov/ij/</a> |
| GraphPad Prism version 8.2.1                     | GraphPad                 | <a href="https://www.graphpad.com/">https://www.graphpad.com/</a>   |
| BioRender software                               | BioRender                | <a href="https://biorender.com/">https://biorender.com/</a>         |
| <b>OTHER</b>                                     |                          |                                                                     |
| Immobilon Western Chemiluminescent HRP substrate | Merck millipore          | Cat#WBKLS0500                                                       |

## Supplementary Figures

### Supplementary Figure S1

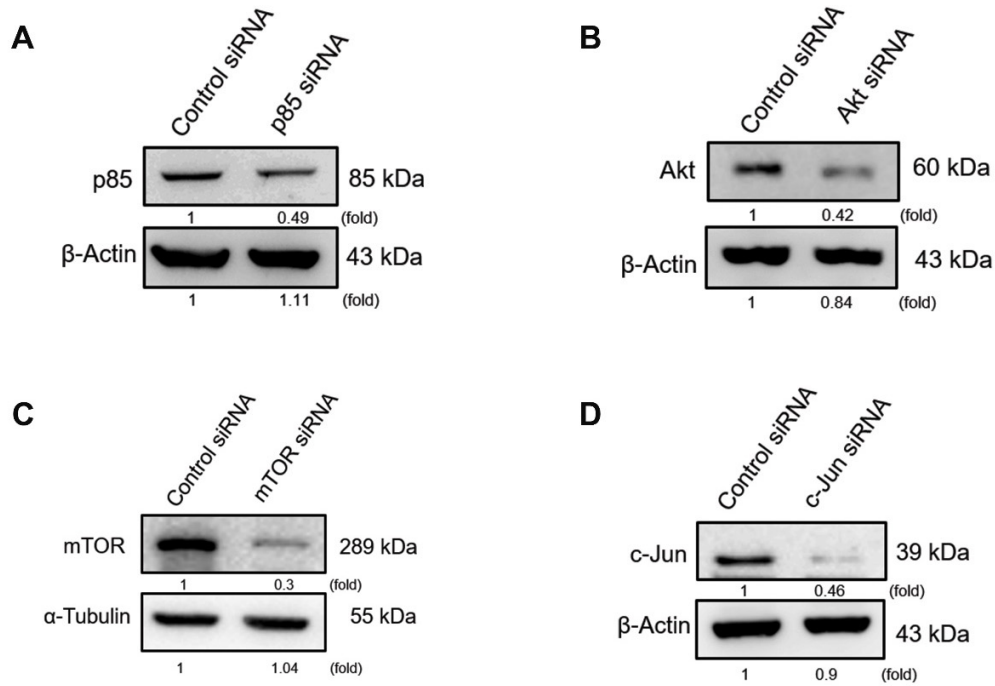

**Supplementary Figure S1.** Western blot detects the knockdown efficacy of various siRNAs against p85, Akt, mTOR, and c-Jun molecules. C2C12 cells were transfected with control siRNA or (A) p85 siRNA, (B) Akt siRNA, (C) mTOR siRNA, and (D) c-Jun siRNA for 24 h. Total proteins were then detected by immunoblotting.  $\beta$ -Actin was used as a loading control. ImageJ software was used to quantify the immunoblotting results and normalized with  $\beta$ -Actin.

## Supplementary Figure S2

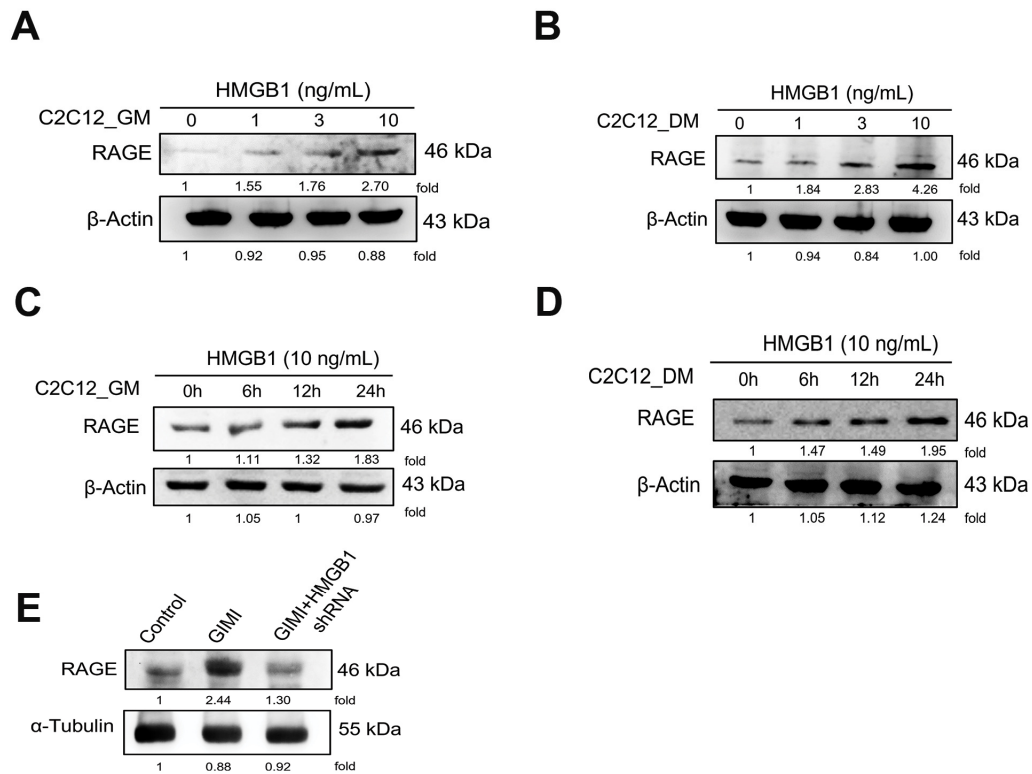

**Supplementary Figure S2.** Western blot detects the expression of RAGE protein expression following HMGB1 treated with dose-dependent manner into C2C12 myoblast cells in growth medium (**A**) or differentiation medium (**B**). Western blot detects the expression of RAGE following HMGB1 (10 ng/mL) treated with time-dependent manner into C2C12 myoblast cells in the growth medium (**C**) and differentiation medium (**D**). β-Actin was used as a loading control. The RAGE expression in glycerol-induced muscle injury (GIMI) mouse model (**E**). α-Tubulin was used as a loading control. ImageJ software was used to quantify the immunoblotting results and normalized with the loading control.

### Supplementary Figure S3

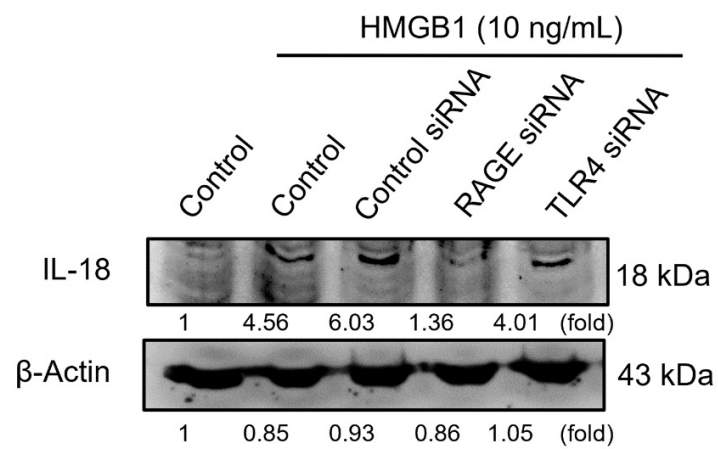

**Supplementary Figure S3.** Western blot detects the expression of IL-18 for siRNAs against RAGE or TLR4 following HMGB1 treatment in C2C12 cells.  $\beta$ -Actin was used as a loading control. ImageJ software was used to quantify the immunoblotting results and normalized with  $\beta$ -Actin.

## Supplementary Figure S4

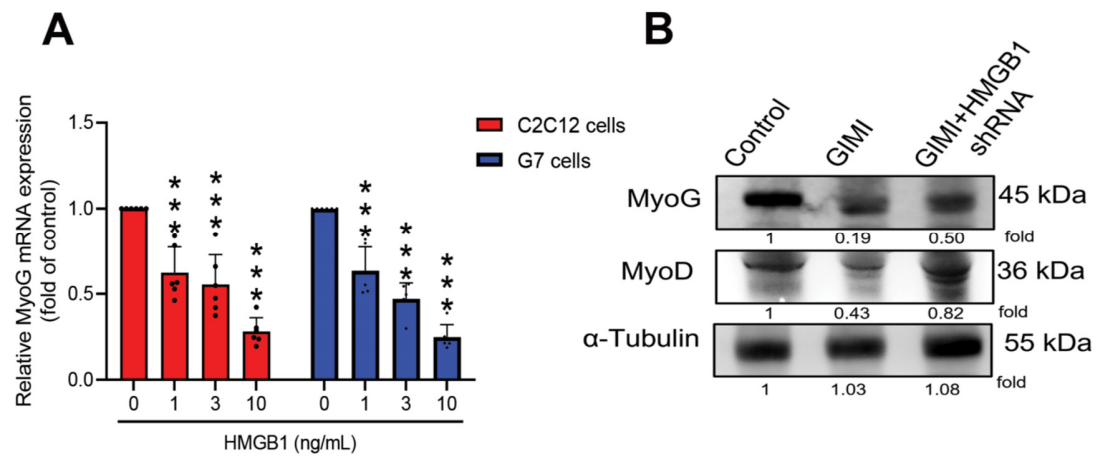

**Supplementary Figure S4.** The expression of myogenic markers *in vitro* and *in vivo*. **(A)** HMGB1 induced myogenin (MyoG) expression with dose-dependent manner in murine C2C12 and G7 cells lines ( $n = 6$ ). **(B)** The expression of MyoG and MyoD was detected by Western blot in a glycerol-induced muscle injury (GIMI) mouse model ( $n = 3$ ).  $\alpha$ -Tubulin was used as a loading control. ImageJ software was used to quantify the immunoblotting results and normalized with the loading control. Results are expressed as means  $\pm$  SD. Statistical analysis was done by using one-way ANOVA and represented as  $p$  value. \* $p < 0.05$  compared with the control group.
